# Supplementary material for: Structure and function of a compound eye, more than half a billion years old
Source: PubMed Central journal article supplement — Proc Natl Acad Sci U S A. 2017 Dec 4;114(51):13489–94. doi: 10.1073/pnas.1716824114 (PMC5754809; doi:10.1073/pnas.1716824114), 2017-12-04
Supplement: pnas.201716824SI.pdf [file pnas.201716824SI.pdf]

# Supporting Information

Schoenemann et al. 10.1073/pnas.1716824114

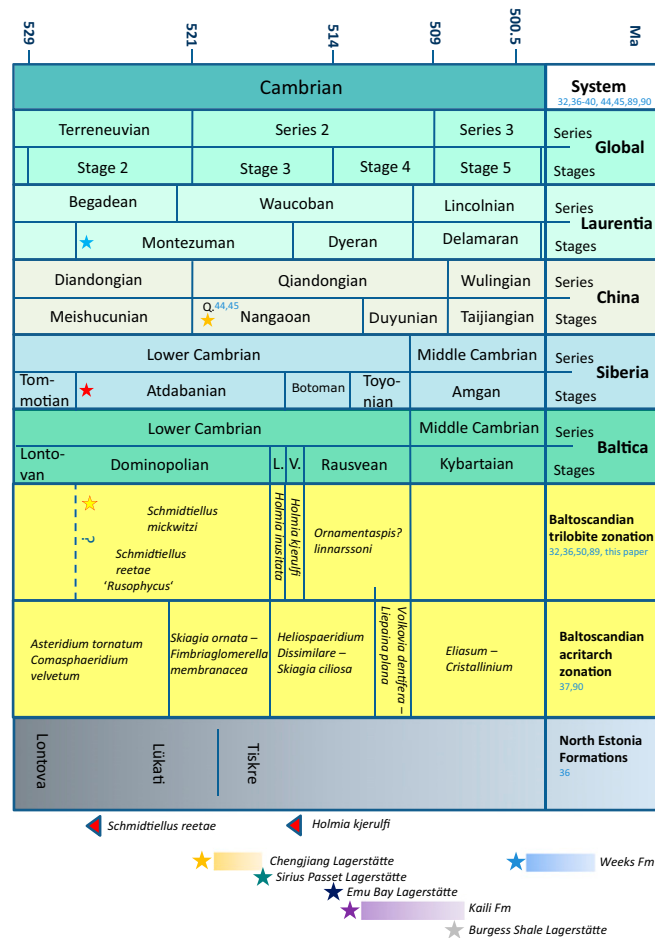

Fig. S1. Stratigraphic assignment of *Schmidtellus reetae* Bergström, 1973 (25).
